# Supplementary material for: Arginase 1 promotes hepatic lipogenesis by regulating ERK2/PPARγ signaling in a non-canonical manner
Source: Research Square preprint supplement (doi:10.21203/rs.3.rs-5630831/v1), 2025-01-15
Supplement: Supplementary file 1 [file 06003c705c541c19d9a36a40.docx]

**STAR*METHODS**

**KEY RESOURCES TABLE**

| REAGENT or RESOURCE | SOURCE | IDENTIFIER |
| --- | --- | --- |
| Antibody |  |  |
| Arg1 | Cell Signaling Technology | 93668 |
| GS | GeneTex | GTX109121 |
| CK19 | Abcam | ab7754 |
| β-actin | HUABIO | ET1701-80 |
| p-AKT (ser473) | HUABIO | ET1607-73 |
| AKT1 | HUABIO | ET1609-47 |
| p-ERK1 (pT202/pY204)/2 (pT185/pY187) | HUABIO | ET1610-13 |
| ERK1/2 | HUABIO | ET1601-29 |
| ERK2 | HUABIO | ET1603-23 |
| ERK2 | HUABIO | EM1910-53 |
| p-mTOR (ser2448) | ImmunoWay Biotechnology | YP0176 |
| mTOR | HUABIO | ET1608-5 |
| p-MEK (S218/S222) | HUABIO | ET1609-50 |
| MEK1/2 | HUABIO | ET1602-3 |
| eIF4EBP-1 | HUABIO | ET1701-83 |
| eIF4EBP1(phospho S65) | Abcam | ab259329 |
| SREBP-1 | HUABIO | ER1917-19 |
| Phospho-p70 S6 Kinase (S434) | HUABIO | RT1456 |
| Ubiquitin | HUABIO | ET1609-21 |
| FASN | HUABIO | ET1701-91 |
| RSK2 | HUABIO | HA721033 |
| c-FOS | HUABIO | ET1701-95 |
| Elk1 | HUABIO | ET1608-19 |
| PPARγ | HUABIO | ET1702-57 |
| Elk1 | HUABIO | ET1608-19 |
| Ras | HUABIO | ET1702-94 |
| CD45 | HUABIO | ET7111-03 |
| 6X His-tag | HUABIO | HA601079 |
| GST | HUABIO | ET1611-47 |
| Flag | HUABIO | M1403-2 |

Chemicals, recombinant proteins, peptides, and virus strains

| BEC | TargetMol | 222638-67-7 |
| --- | --- | --- |
| VX-11e | TargetMol | 896720-20-0 |
| TBHQ | TargetMol | 1948-33-0 |
| MG132 | TargetMol | 133407-82-6 |
| Flag-ERK2 plasmids | HUABIO | N/A |
| Flag-mut ERK2 plasmids | HUABIO | N/A |
| ***Continued*** |  |  |
| REAGENT or RESOURCE | SOURCE | IDENTIFIER |
| His-ERK2/His-ERK2 mut  recombinant proteins | HUABIO | N/A |
| His-Arg1 recombinant proteins | HUABIO | N/A |
| GST-Arg1/GST-Arg1 mut recombinant proteins | HUABIO | N/A |
| GST-peptide | HUABIO | N/A |
| Drug peptide-Bio/Chem | HUABIO | N/A |
| AAV8-TBG-Arg1-mut21&181-His | WZ Biosciences Inc. | N/A |
| AAV8-TBG-Arg1304-322-mut-His | WZ Biosciences Inc. | N/A |
| AAV8-TBG-cre | WZ Biosciences Inc. | N/A |

Critical commercial assays

| Duolink *in situ* PLA kit | Sigma-Aldrich | DUO92008 |
| --- | --- | --- |
| Free fatty acid assay kits | Wako Pure Chemical Industries, Ltd. | 294-63601 |
| Triglyceride assay kits | Applygen Technologies | E1013 |
| Nuclear Isolation Kit | Sigma-Aldrich | NXTRACT |
| RNA Isolation kit | Foregene, Chengdu | RE-03011 |
| iScriptcDNA Synthesis kit | Bio-Rad | 179-8890 |

Experimental models

| *Albumin-Cre transgenic* mice, male | Shanghai Biomodel Organism Science | N/A |
| --- | --- | --- |
| *Arg1fl/fl* mice | This paper | N/A |
| *db/db* mice, male | GemPharmatech co. ltd. | N/A |
| C57BL/6, male | GemPharmatech co. ltd. | N/A |

Oligonucleotides

| m-β-actin:F-CCAGCCTTCCCTTCTTGGGTA;  R-CAATGCCTGGGTACATGGTG | This paper | N/A |
| --- | --- | --- |
| m-AP2:F-CTTTGTGGGAACCTGGAAGC;  R-ATGATCATGTTGGGCTTGGC | This paper | N/A |
| m-PPARγ:F-GGAATCAGCTCTGTGGACCT; R-GTGGAGCAGAAATGCTGGAG | This paper | N/A |
| m-Acly:F-GTCCCAAGTCCAAGATCCCTG; R-ACGCAAAGTTGATCAGCACG | This paper | N/A |
| m-Fasn:F-GGCCCCTCTGTTAATTGGCT;  R-GGATCTCAGGGTTGGGGTTG | This paper | N/A |
| m-Plin1:F-TGCAGAACACTCTCCGGAAC;  R-TGTCTCGGAATTCGCTCTCG | This paper | N/A |
| m-Plin2:F-GTGTGTGAGATGGCCGAGAA;  R-AACAATCTCGGACGTTGGCT | This paper | N/A |
| m-CD36:F-GCAGCCTCCTTTCCACCTTT; R:TGTCTGGATTCTGGAGGGGT | This paper | N/A |

Software and algorithms

| ImagJ | ImageJ software | https://imagej.nih.gov/ij/download.html |
| --- | --- | --- |
| GraphPad Prism 10 software (GraphPad) | GraphPadSoftware | https://www.graphpad.com |

Other

| REAGENT or RESOURCE | SOURCE | IDENTIFIER |
| --- | --- | --- |
| HFD | Readydietech Co., Ltd. | D09100301 |
| MCD | Readydietech Co., Ltd. | A02082002B |
